# Supplementary material for: Comparative genomics of 43 strains of Xanthomonas citri pv. citri reveals the evolutionary events giving rise to pathotypes with different host ranges
Source: PubMed Central journal article supplement (PMC4690215; doi:10.1186/s12864-015-2310-x), 2015-12-23
Supplement: 12864_2015_2310_MOESM3_ESM.pdf [file 12864_2015_2310_MOESM3_ESM.pdf]

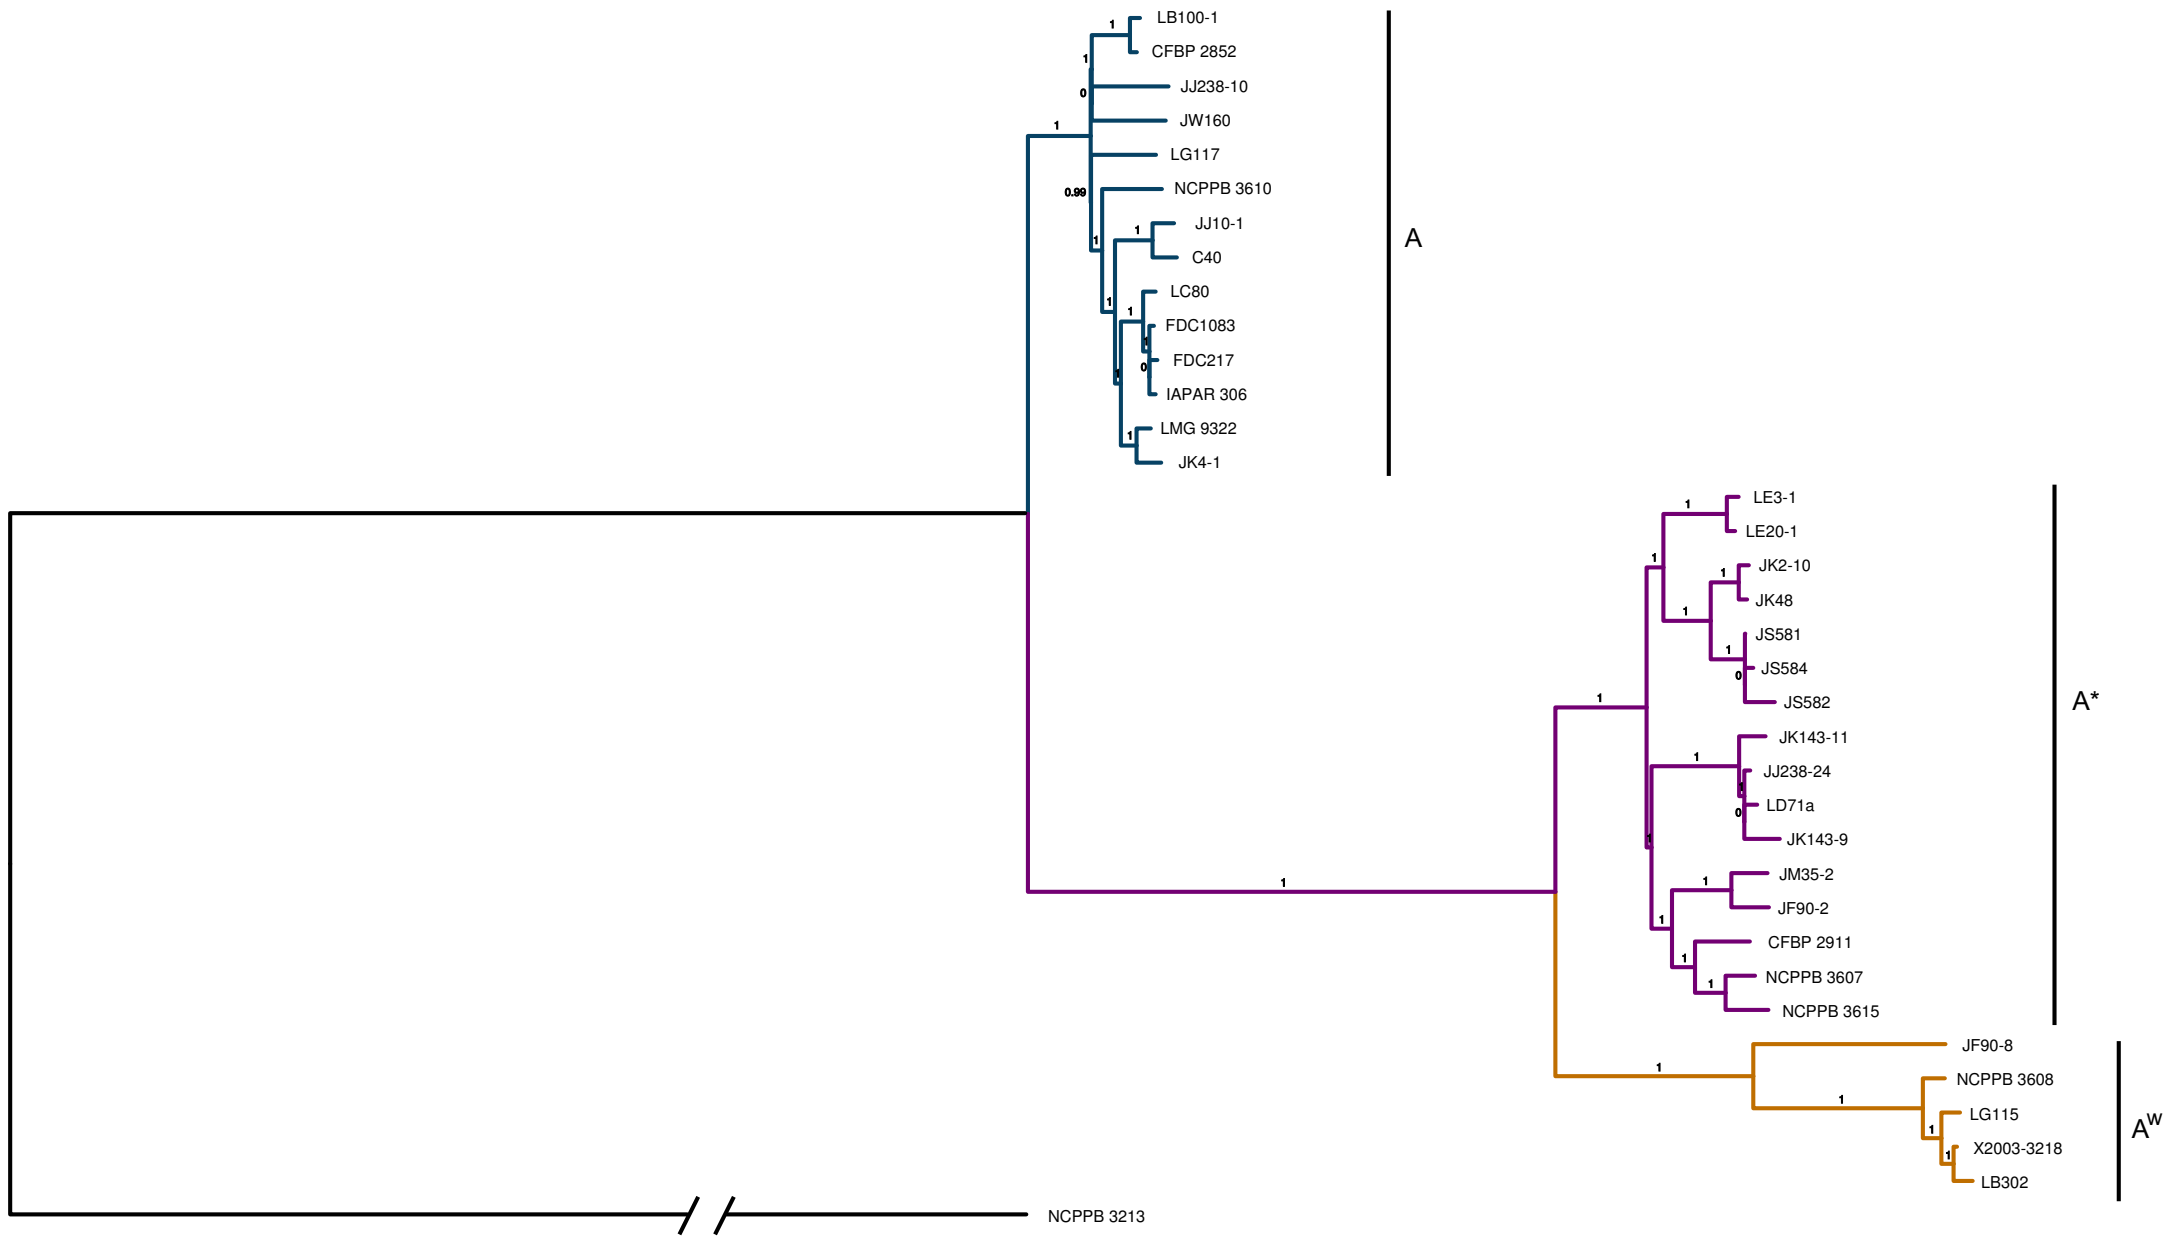

0.001

A

A\*

A<sup>w</sup>
